# Supplementary material for: Fe-MIL-101 metal organic framework integrated solid polymer electrolytes for high-performance solid-state lithium metal batteries
Source: Royal Society of Chemistry journal article supplement (doi:10.1039/d3ta05619h), 2024-01-01
Supplement: d3ta05619h1.pdf [file d3ta05619h1.pdf]

## Supplementary Information

# **Fe-MIL-101 Metal Organic Framework Enhanced Solid Polymer Electrolytes for High-Performance Solid-State Lithium Metal Batteries**

Ramesh Subramani,<sup>a,‡</sup> Su-Yang Hsu,<sup>a,‡</sup> Yu-Chun Chuang,<sup>a</sup> Liang-Ching Hsu,<sup>a</sup> Kueih-Tzu Lu,<sup>a,\*</sup> Jin-Ming Chen<sup>a,b,\*</sup>

<sup>a</sup>National Synchrotron Radiation Research Center, Hsinchu, 30076, Taiwan.

<sup>b</sup>Department of Electrophysics, National Yang Ming Chiao Tung University (NYCU), Hsinchu 30010, Taiwan

\* Corresponding Author (E-mail: [ktlu@nsrrc.org.tw](mailto:ktlu@nsrrc.org.tw)) (K. T. L)

\* Corresponding Author (E-mail: [jmchen@nsrrc.org.tw](mailto:jmchen@nsrrc.org.tw)) (J. M. C.)

‡ The authors are contributed equally to this work.

Keywords: solid polymer electrolytes, Fe-MIL-101, MOF fillers, *in-situ* XRD, XAS, solid-state LMBs

## Supplementary Information for:

- (1) Crystal structure of Fe-MIL-101
- (2) SEM and EDS mappings of Fe-MIL-101 powder
- (3) XRD profiles of Fe-MIL-101, PVdF-HFP, and SPE-10 membrane
- (4) Cross-sectional SEM image of Fe-MIL-101-integrated SPE membrane
- (5) Optical image, SEM and EDS of SPE-0
- (6) EIS spectra of various SPEs at different temperatures
- (7)  $t_{Li^+}$  measurements of different SPEs
- (8) EIS of Li||Li symmetric cells
- (9) DSC curves of SPE-0 and SPE-10 membranes
- (10) Plating-stripping profile of Li|SPE|Li symmetric cells
- (11) Tafel plots of Li|SPE|Li symmetric cells
- (12) RDF of FT  $k^3$ -weighted Fe K-edge EXAFS spectra of Fe- MIL-101 and SPE-10
- (13) CV profiles of Li|SPE-10|LFP and Li|SPE-0|LFP cells
- (14) EIS profiles of Li|SPE-10|LFP and Li|SPE-0|LFP cells
- (15) Comparison of electrochemical performance of solid-state Li||LFP batteries
- (16) XRD patterns of the LFP cathodes
- (17) Fe K-edge XANES and RDF of FT  $k^3$ -weighted EXAFS spectra of Li|SPE-0|LFP cells
- (18) *In-situ* Li|SPE-10|LFP cell
- (19) *In-situ* XRD patterns of Li|SPE-10|LFP cell
- (20) Rate capability of Li|SPE-0|NMC622 cell

## 1. Crystal structure of Fe-MIL-101

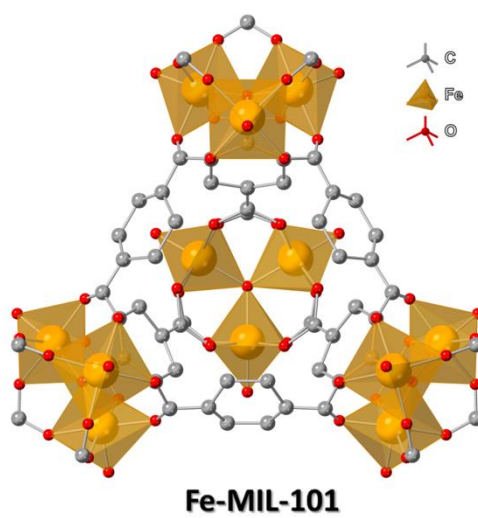

Fig. S1 Crystal structure of Fe-MIL-101.

## 2. SEM and EDS mappings of Fe-MIL-101 powder

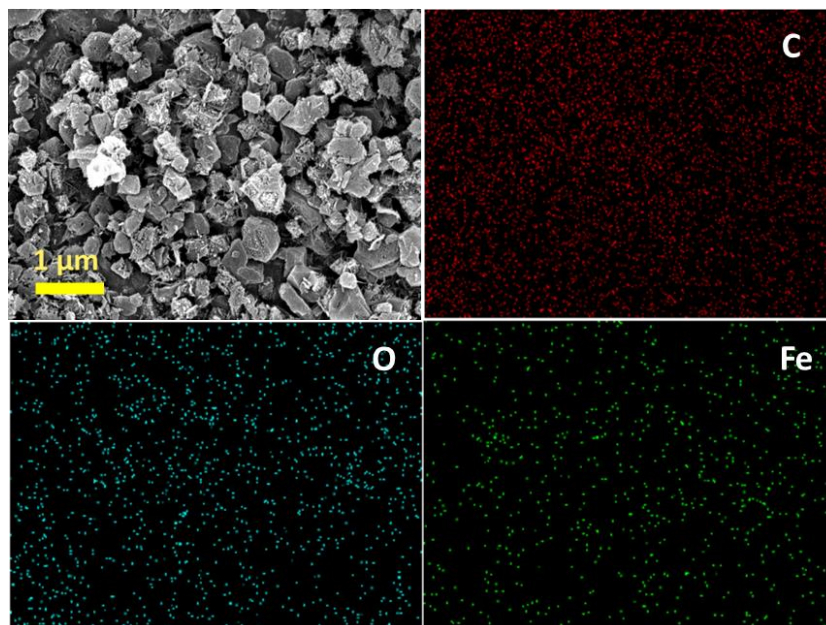

Fig. S2 SEM image of Fe-MIL-101 powder with corresponding elemental mapping.

3. XRD profiles of Fe-MIL-101, PVdF-HFP, and SPE-10 membrane

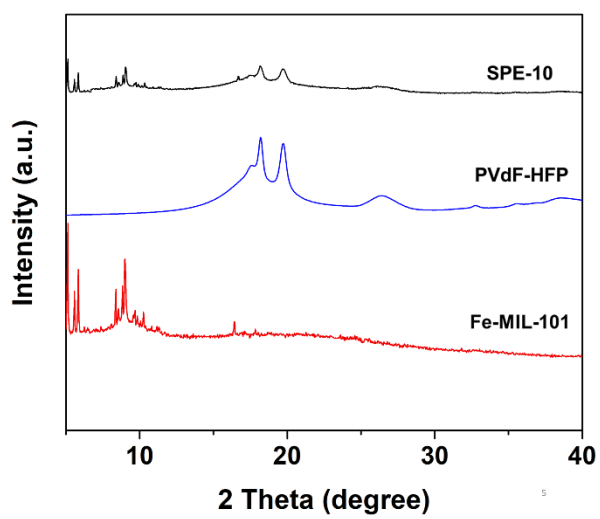

Fig. S3 XRD profiles of Fe-MIL-101, PVdF-HFP, and SPE-10 membrane.

4. Cross-sectional SEM image of Fe-MIL-101-integrated SPE membrane

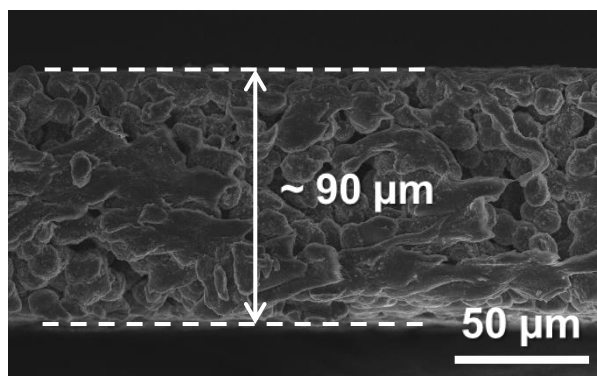

Fig. S4 Cross-sectional SEM image of Fe-MIL-101-integrated SPE membrane.

## 5. Optical image, SEM and EDS of SPE-0

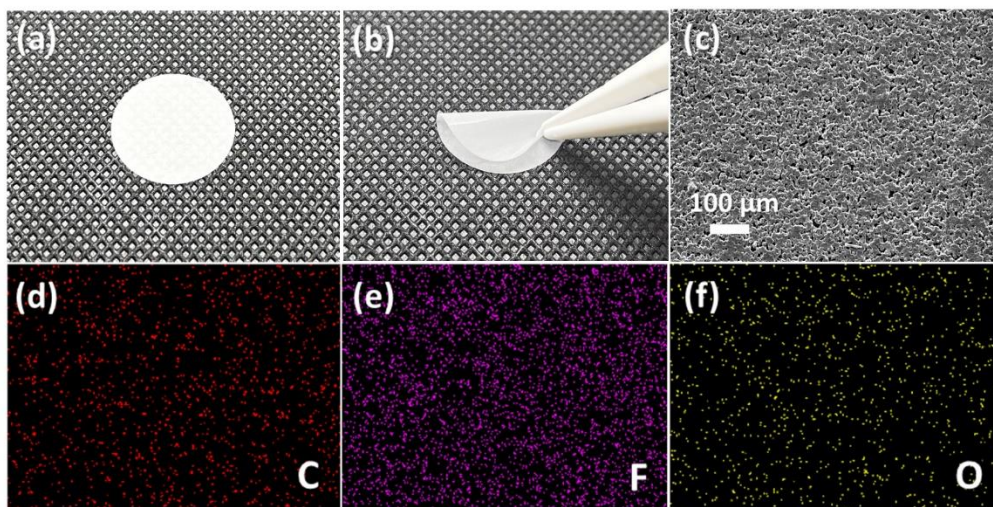

Fig. S5 Characterization of SPE membrane without Fe-MIL-101 (SPE-0): a) Optical image of SPE-0; b) Optical image of folded SPE-0; c) Top-view SEM image; and d, e, f) the corresponding elemental mappings of SPE-0.

## 6. EIS spectra of various SPEs at different temperatures

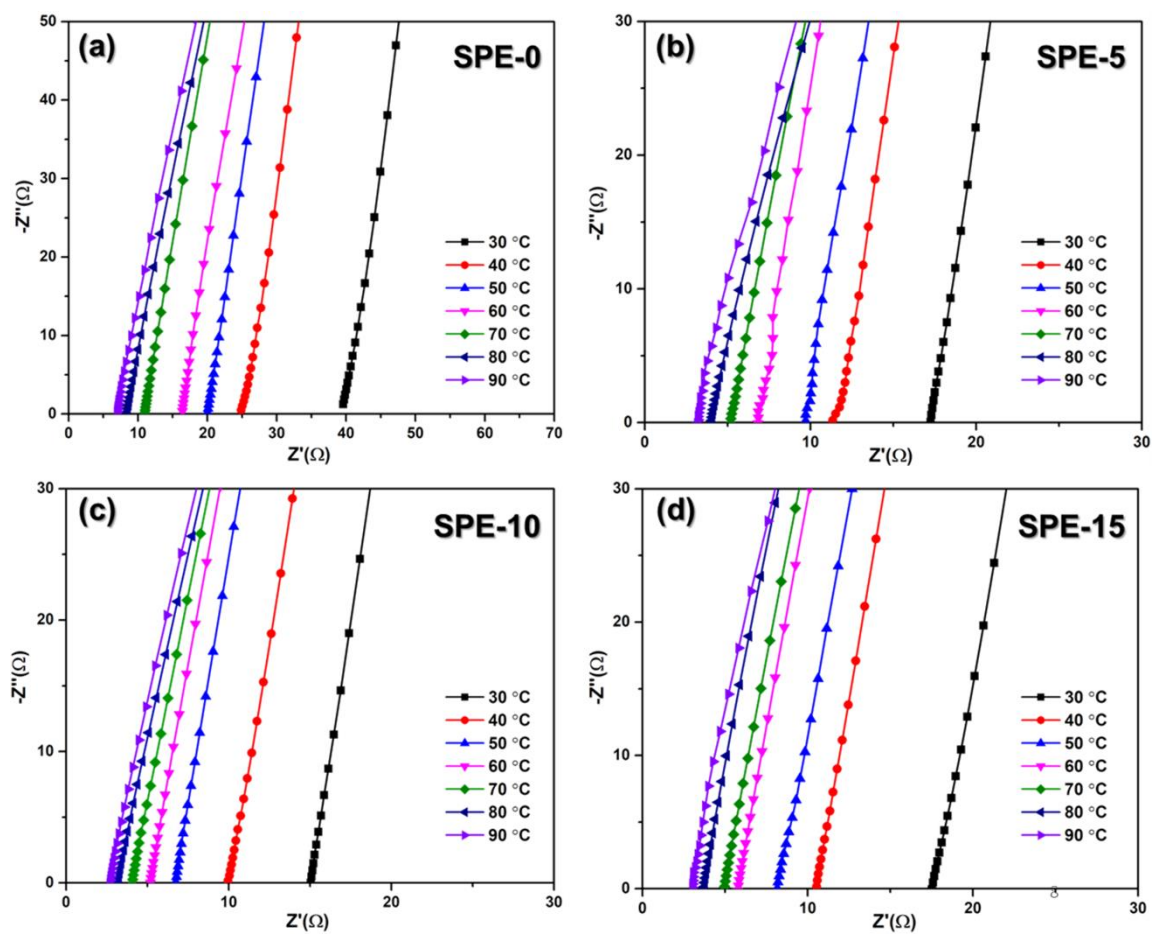

Fig. S6 EIS spectra of various SPEs at different temperatures ranging from 30 to 90°C: a) SPE-0, b) SPE-5, c) SPE-10 and d) SPE-15.



## 7. $t_{Li^+}$ measurements of different SPEs

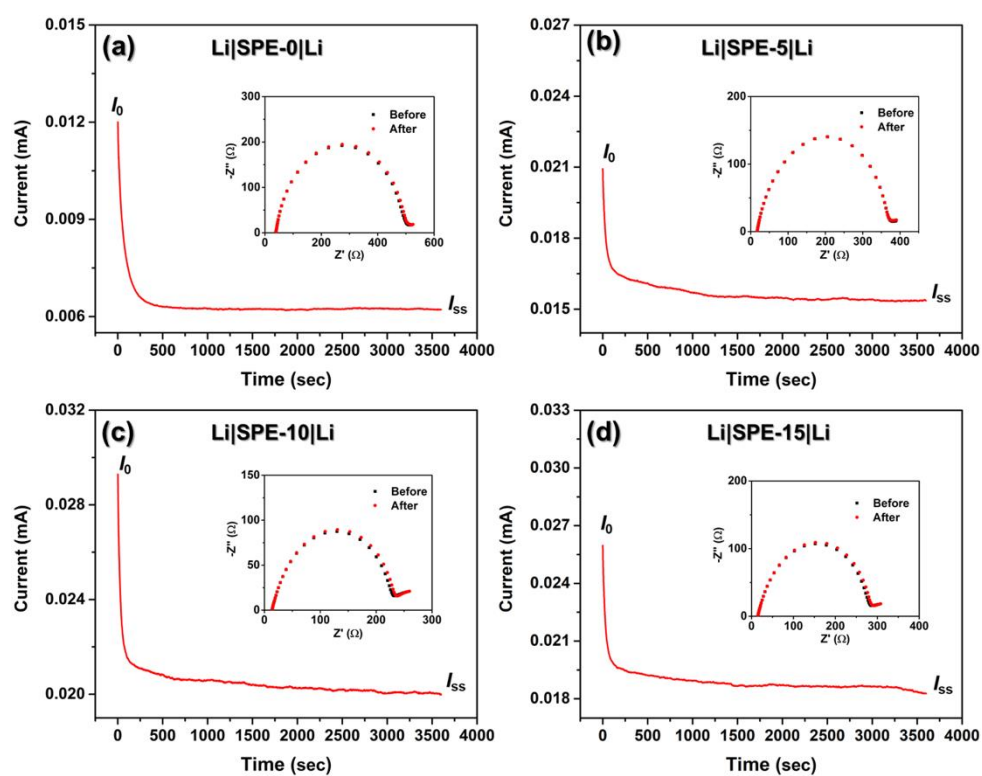

Fig. S7 a-d) Chronoamperometry curves of Li||Li symmetric cells under 10 mV polarization with SPE-0, SPE-5, SPE-10, and SPE-15 electrolytes, respectively. Insets of Fig. S7a, b, c, and d show Nyquist profiles of the corresponding cell before and after polarization.

8. EIS of Li|Li symmetric cells

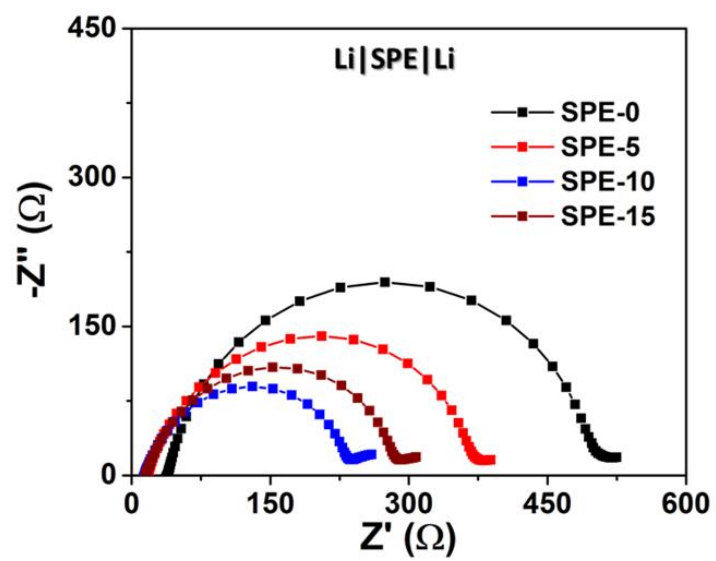

Fig. S8 Electrochemical impedance profiles of Li|SPE|Li cells with different SPEs.

9. DSC curves of SPE-0 and SPE-10 membranes

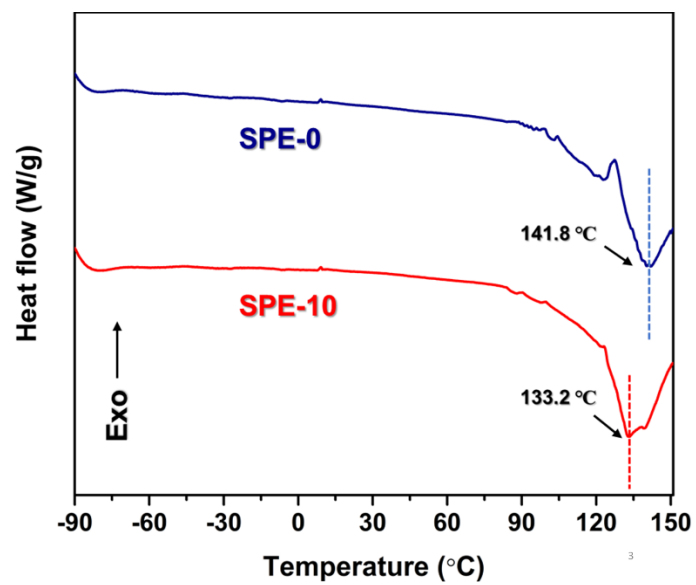

Fig. S9 DSC curves of SPE-0 and SPE-10 membranes.

10. Plating-stripping profile of Li|SPE|Li symmetric cells

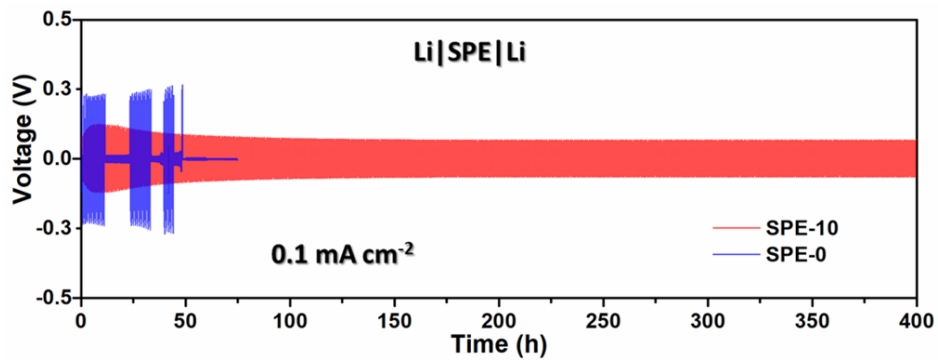

Fig. S10 Time-voltage profiles of SPE-0 and SPE-10 in a Li||Li symmetric cell at a current density of  $0.1 \text{ mA cm}^{-2}$ .

11. Tafel plots of Li|SPE|Li symmetric cells

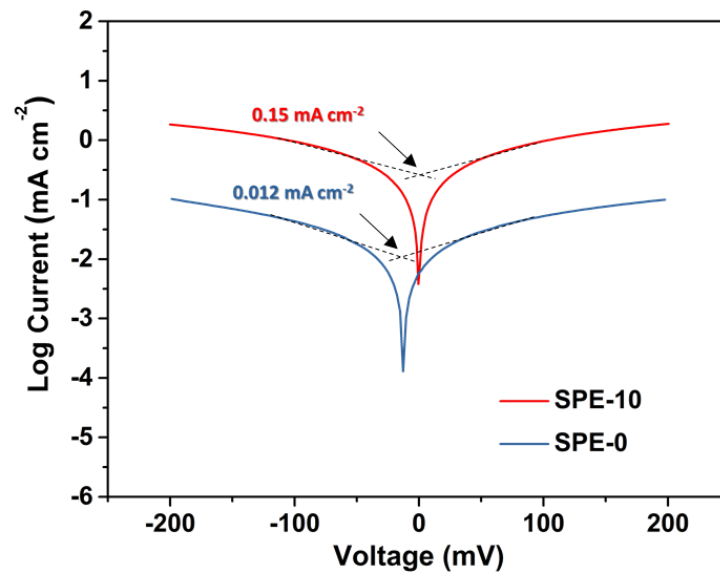

Fig. S11 Tafel plots for Li|SPE|Li symmetric cells with different SPEs.

## 12. RDF of FT $k^3$ -weighted Fe K-edge EXAFS spectra of Fe-MIL-101 and SPE-10

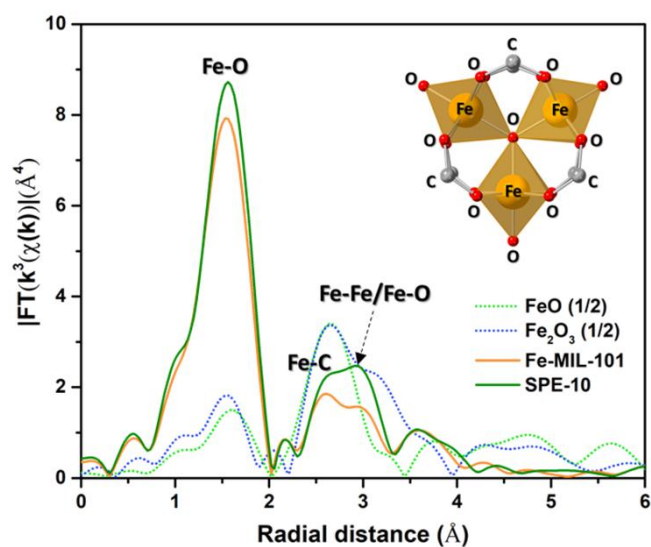

Fig. S12 RDF of FT  $k^3$ -weighted Fe K-edge EXAFS spectra of Fe-MIL-101 and SPE-10 without phase shift correction. The intensities corresponding to FeO and Fe<sub>2</sub>O<sub>3</sub> are scaled by a factor of 0.5. A fragment of Fe-MIL-101 crystal structure is shown in the inset of Fig. S12.

13. CV profiles of Li|SPE-10|LFP and Li|SPE-0|LFP cells

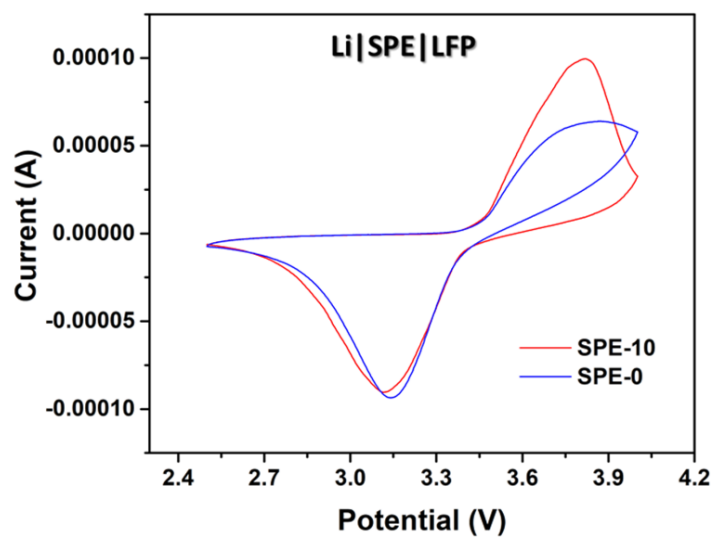

Fig. S13 CV profiles of SPE-0 and SPE-10 in a Li||LFP cell at a scan rate of  $0.1 \text{ mV s}^{-1}$ .

14. EIS of Li|SPE-10|LFP and Li|SPE-0|LFP cells

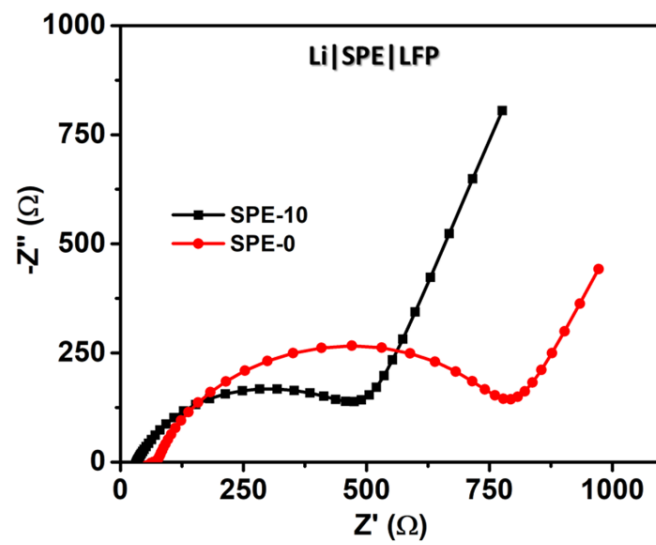

Fig. S14 Electrochemical impedance spectra of SPE-0 and SPE-10 in a Li||LFP cell.



## 15. Comparison of electrochemical performance of solid-state Li||LFP batteries

| Polymer matrix                     | Fillers                                                                               | Rate (C) | Capacity retention (%)                | Temperature °C   | Refs.     |
|------------------------------------|---------------------------------------------------------------------------------------|----------|---------------------------------------|------------------|-----------|
| PEO/LiTFSI                         | Fe-MIL-100                                                                            | 0.2      | 98.2 @ 100 cycles                     | 60               | 1         |
| PEO/LiTFSI                         | PDA <sup>a)</sup> coated hollow SiO <sub>2</sub> nanosphere                           | 0.2      | 97.2 @ 205 cycles                     | 60               | 2         |
| PEO/LiTFSI/EMIM-TFSI <sup>b)</sup> | Co/HPCN <sup>c)</sup>                                                                 | 0.2      | 99.1 @ 150 cycles                     | 60               | 3         |
| PEO/LiTFSI                         | Li <sub>6.25</sub> La <sub>3</sub> Zr <sub>2</sub> Al <sub>0.25</sub> O <sub>12</sub> | 0.1      | 80 @ 210 cycles                       | 50               | 4         |
| PEO/LiTFSI                         | Halloysite nanotube                                                                   | 0.1      | 90.9 @ 100 cycles<br>~88 @ 300 cycles | 25               | 5         |
| PEO/LiTFSI                         | Silica nanotube                                                                       | 0.1      | 83.4 @ 100 cycles                     | 60               | 6         |
| SN <sup>d)</sup> /LiTFSI           | ZIF-8 <sup>e)</sup>                                                                   | 0.1      | 87.7 @ 100 cycles                     | -                | 7         |
| PVdF-HFP/LiTFSI                    | Fe-MIL-101                                                                            | 0.2      | 91 @ 300 cycles<br>89 @ 400 cycles    | RT <sup>f)</sup> | This work |

<sup>a)</sup>polydopamine; <sup>b)</sup>1-ethyl-3-methylimidazolium bis(trifluoromethylsulfonyl)imide; <sup>c)</sup>MOF-derived Co-doped hollow porous carbon nanocages; <sup>d)</sup>succinonitrile; <sup>e)</sup>zeolitic imidazolate framework-8; <sup>f)</sup>room temperature.

Table S1 Comparison of electrochemical performance of solid-state Li||LFP batteries achieved by various electrolytes in previous reports.

## 16. XRD patterns of LFP cathodes

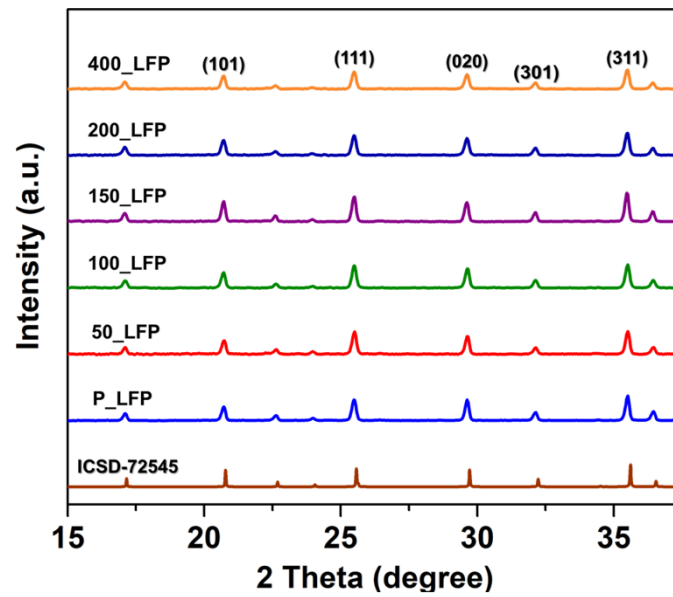

Fig. S15 XRD patterns of pristine (labeled as P\_LFP) and cycled LFP cathodes detached from Li|SPE-10|LFP cells after 50, 100, 150, 200, and 400 charge-discharge cycles (labeled as 50\_LFP, 100\_LFP, 150\_LFP, 200\_LFP, and 400\_LFP, respectively) at 0.2 C. 400\_LFP cathode is detached from the Li|SPE-10|LFP cell used in Fig. 4e.

17. Fe K-edge XANES and RDF of FT  $k^3$ -weighted EXAFS spectra of Li|SPE-0|LFP cells

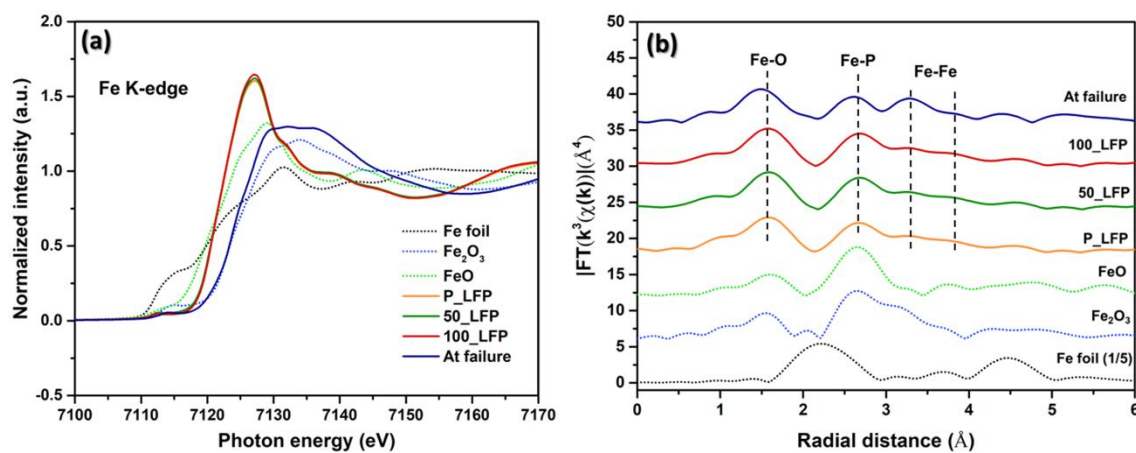

Fig. S16 a) Fe K-edge XANES, and b) RDF of FT  $k^3$ -weighted Fe K-edge EXAFS spectra without phase shift correction of pristine (labeled as P\_LFP) and cycled LFP cathodes detached from Li|SPE-0|LFP cells after 50, 100 charge-discharge cycles at 0.2 C and at failure (labeled as 50\_LFP, 100\_LFP, and At failure, respectively). The intensity corresponding to Fe foil in Fig. S16b is scaled by a factor of 0.2.

18. *In-situ* Li|SPE-10|LFP cell

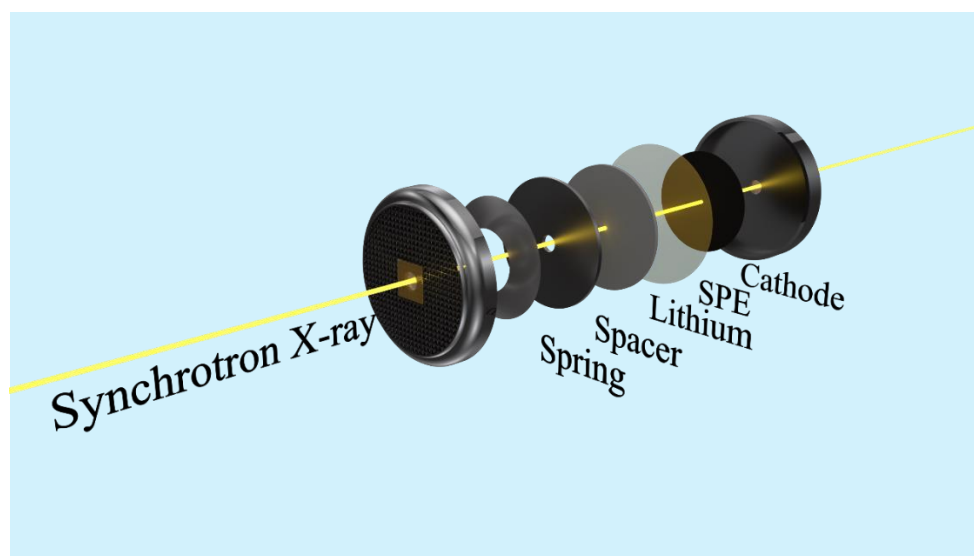

Fig. S17 *In-situ* Li|SPE-10|LFP cell.

19. *In-situ* XRD patterns of Li|SPE-10|LFP cell

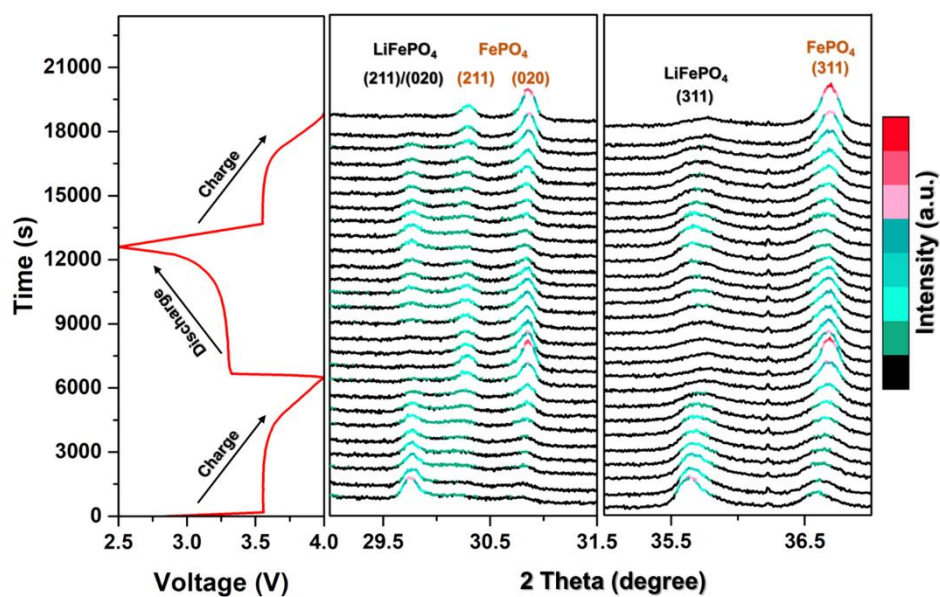

Fig. 18 XRD patterns of *in-situ* Li|SPE-10|LFP cell during the initial charge-discharge cycle at 0.2 C, along with the second charge step. The horizontal axis corresponds to specific 2-theta regions, while the vertical axis represents time. Color-coded diffraction intensity is represented, with the scale bar provided on the right side. The corresponding voltage curve is presented on the left side.

20. Rate capability of Li|SPE-0|NMC622 cell

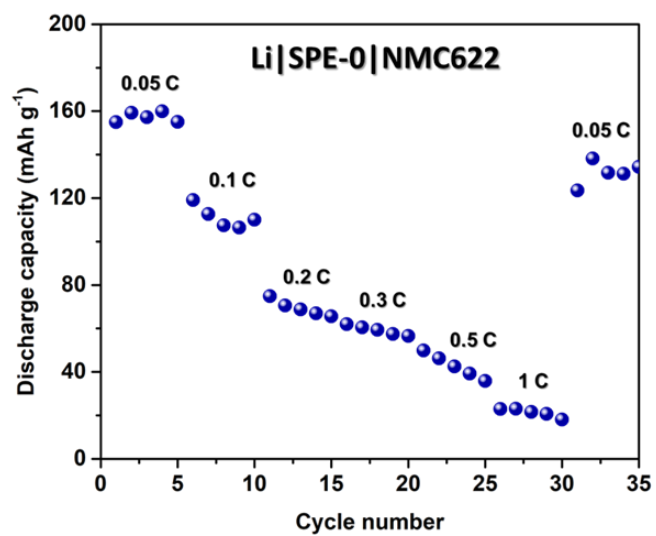

Fig. S19 Rate capability of Li|SPE-0|NMC622 cell.

## References

1. T. Wei, Z. Wang, M. Zhang, Q. Zhang, J. Lu, Y. Zhou, C. Sun, Z. Yu, Y. Wang and M. Qiao, *Mater. Today Commun.*, 2022, **31**, 103518.
2. Y. Li, Y. Qin, J. Zhao, M. Ma, M. Zhang, P. Li, S. Lu, H. Bu, K. Xi and Y. Su, *ACS Appl. Mater. Interfaces*, 2022, **14**, 18360-18372.
3. Z. Zhang, Y. Huang, H. Gao, C. Li, J. Hang and P. Liu, *J. Energy Chem.*, 2021, **60**, 259-271.
4. J. Cheng, G. Hou, Q. Chen, D. Li, K. Li, Q. Yuan, J. Wang and L. Ci, *Chem. Eng. J.*, 2022, **429**, 132343.
5. Q. Zhu, X. Wang and J. D. Miller, *ACS Appl. Mater. Interfaces*, 2019, **11**, 8954-8960.
6. J. Hu, W. Wang, X. Zhu, S. Liu, Y. Wang, Y. Xu, S. Zhou, X. He and Z. Xue, *J. Membr. Sci.*, 2021, **618**, 118697.
7. D. Han, P. Wang, P. Li, J. Shi, J. Liu, P. Chen, L. Zhai, L. Mi and Y. Fu, *ACS Appl. Mater. Interfaces*, 2021, **13**, 52688-52696.
